# Supplementary material
Source: publisher figshare collection journal article supplement (https://acs.figshare.com/ndownloader/files/14225777)
Supplement: Supplementary file 1 [file 14225777]

# **Effects of heat setting on the morphology and performances of polypropylene separator for lithium ion batteries**

Fangxinyu Zeng <sup>1</sup>, Ruizhang Xu<sup>1</sup>, Lei Ye <sup>1</sup>, Bijin Xiong <sup>2</sup>, Jian Kang <sup>1,\*</sup>, Ming Xiang <sup>1</sup>, Lu Li <sup>3</sup>,  
Xingyue Sheng <sup>3</sup>, Zengheng Hao <sup>3</sup>

<sup>1</sup> State Key Laboratory of Polymer Materials Engineering, Polymer Research Institute of Sichuan University, Chengdu 610065, China

<sup>2</sup> School of Chemistry and Chemical Engineering, Huazhong University of Science and Technology (HUST), Wuhan 430074, China

<sup>3</sup> Chongqing Zhixiang Paving Technology Engineering Co., Ltd., Chongqing, 401336, China

\* Corresponding author.

Jian Kang, e-mail: jiankang@scu.edu.cn

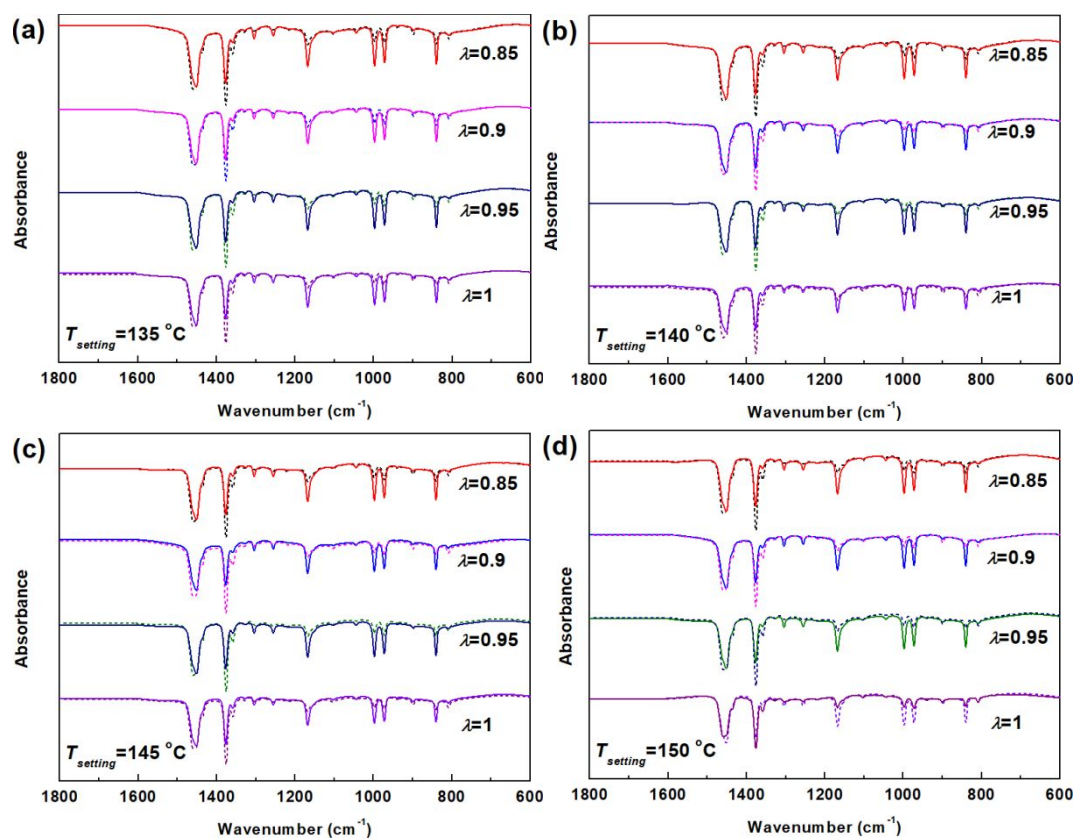

Figure S1 Infrared dichroism spectra of the separators after heat setting treatment at the indicated temperature ( $T_{\text{setting}}$ ) and heat setting ratio ( $\lambda$ ). The solid lines correspond the spectra obtained parallel to the machine direction, while the dashed lines correspond to the spectra obtained perpendicular to the machine direction.
